# Supplementary material for: Developing Sensitive Golden Plate Biosensor for Early Detection of Serum Cardiac Troponin I as Diagnostic Biomarkers
Source: Preprints.org preprint supplement (doi:10.20944/preprints201809.0093.v1), 2018-09-05
Supplement: Supplementary file 1 [file supplementary]

**Processing of preparation of golden nanoparticles immobilized with monoclonal antibodie) cardiac troponin I (cTI) monoclonal antibodies (1&2) and measurement of cTI by sandwich technique that cTI binding with Illustration of antibody-cTI and conjugates with horse reddish peroxidase (HRP).**
